# Supplementary material for: Mass-producible polyhedral macrotube carbon arrays with multi-hole cross-section profiles: superb 3D tertiary porous electrode materials for supercapacitors and capacitive deionization cells
Source: Royal Society of Chemistry journal article supplement (doi:10.1039/d0ta00682c), 2020-01-01
Supplement: d0ta00682c1.pdf [file d0ta00682c1.pdf]

Electronic Supplementary Information

**Mass-Producible Polyhedral Macrotube Carbon Arrays  
with Multi-holes Cross Section Profiles: Superb 3D Tertiary  
Porous Electrodes' Materials for Supercapacitors and  
Capacitive Deionization Cells**

Xiumei Ma<sup>a</sup>, Qinghao Wu<sup>a</sup>, Wei (Alex) Wang<sup>a\*</sup>, Shanfu Lu<sup>a\*</sup>, Yan Xiang<sup>a\*</sup>, and  
Doron Aurbach<sup>b</sup>

*<sup>a</sup>Beijing Key Laboratory of Bio-inspired Energy Materials and Devices, School of  
Space and Environment, Beihang University, Beijing 100191, P. R. China*

*<sup>b</sup>Chemistry department and BINA-BIU center for nano-technology and advanced  
materials, Bar-Ilan university, Ramat-Gan, 5290002, Israel*

\*Corresponding author:      [wwangbj@buaa.edu.cn](mailto:wwangbj@buaa.edu.cn);      [lusf@buaa.edu.cn](mailto:lusf@buaa.edu.cn);  
[xiangy@buaa.edu.cn](mailto:xiangy@buaa.edu.cn)

**Table S1** ASAR comparison of LS500/A800 based CDI with that of CDI reported in literatures.

|            | Concentration of NaCl solution | Voltage (V) | Flow rate (mL min <sup>-1</sup> ) | ASAR (mg g <sup>-1</sup> min <sup>-1</sup> ) | Ref       |
|------------|--------------------------------|-------------|-----------------------------------|----------------------------------------------|-----------|
| ZFCarbon   | 1 mM                           | 1.2         | 50                                | <3                                           | 1         |
| 3DHGR      | 100 ppm                        | 1.2         | 50                                | <0.6                                         | 2         |
| NP-3DHCA   | 500 mg L <sup>-1</sup>         | 1.2         | 40                                | <1                                           | 3         |
| N-PHCS     | 500 mg L <sup>-1</sup>         | 1.2         | 40                                | <2                                           | 4         |
| 600-NS-DCM | 40 mg L <sup>-1</sup>          | 1.4         | 25                                | < 0.7                                        | 5         |
| AC granule | 1000 mg L <sup>-1</sup>        | 1.5         | 8                                 | <0.3                                         | 6         |
| N-HMCSs    | 100 mg L <sup>-1</sup>         | 1.6         | 25                                | <2.5                                         | 7         |
| LS500/A800 | 500 mg L <sup>-1</sup>         | 1.0         | 4.5                               | 3.6                                          | This work |
|            |                                | 1.2         |                                   | 3.8                                          |           |
|            |                                | 1.4         |                                   | 3.9                                          |           |

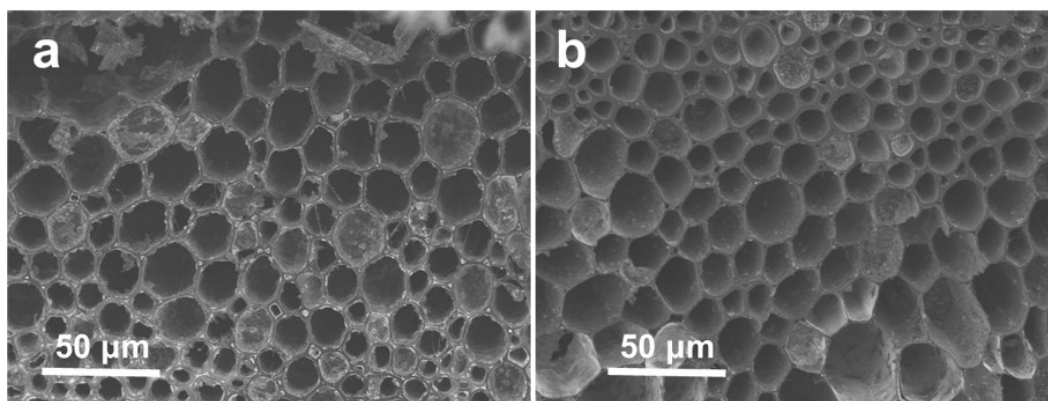

**Figure S1** SEM images of a) LS400/A800, and b) LS600/A800 carbon materials.

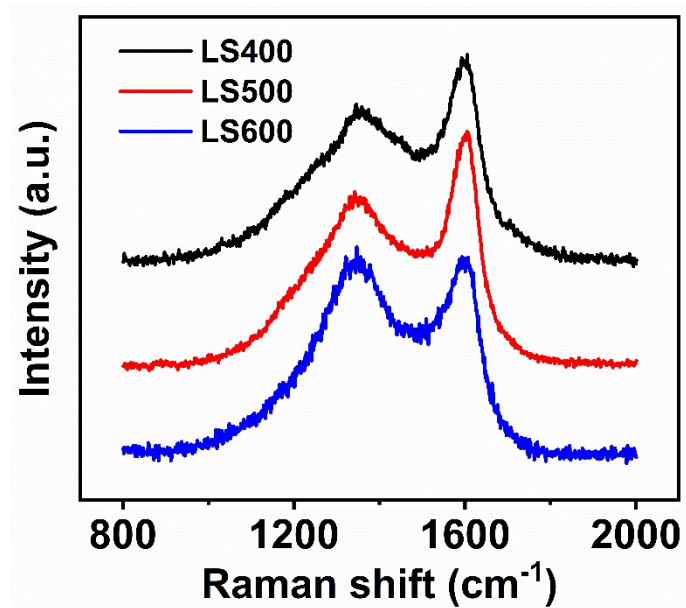

**Figure S2** Raman spectra of LS<sub>x</sub> (x=400, 500, 600) carbon materials

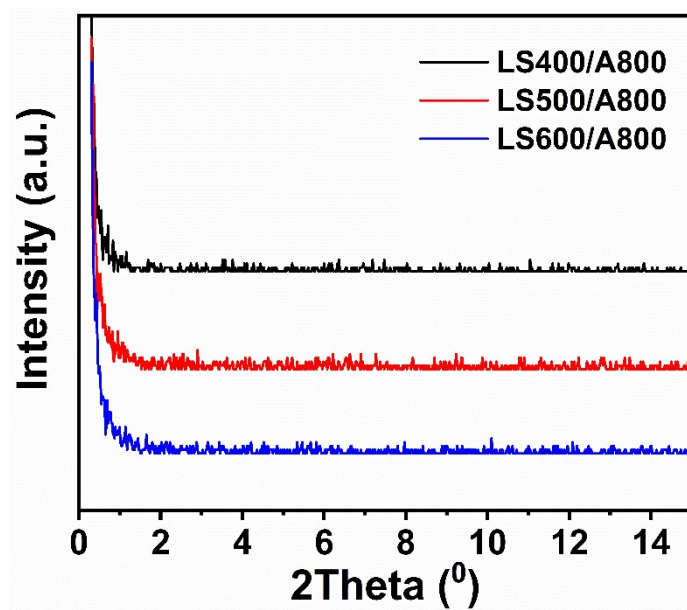

**Figure S3** Small angle XRD patterns of LS<sub>x</sub>/A800 (x=400, 500, 600) carbon materials

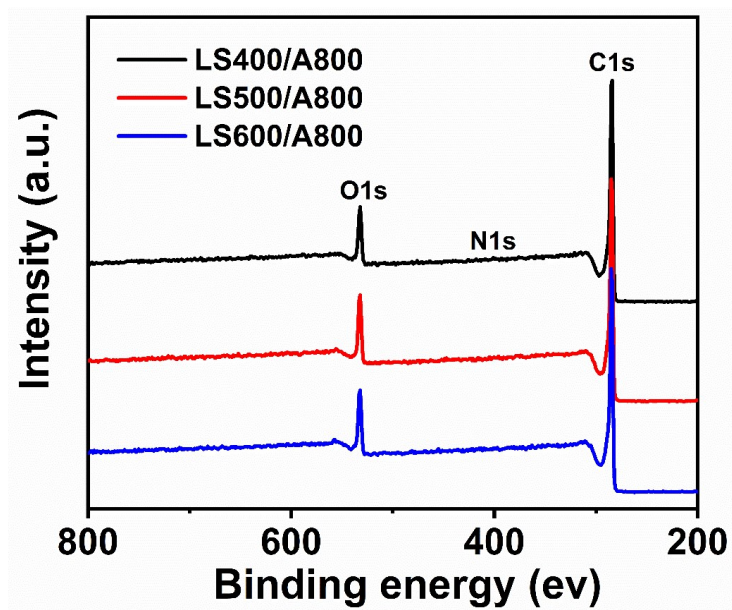

Figure S4 XPS spectra of LS<sub>x</sub>/A800 (x=400, 500, 600) carbon materials

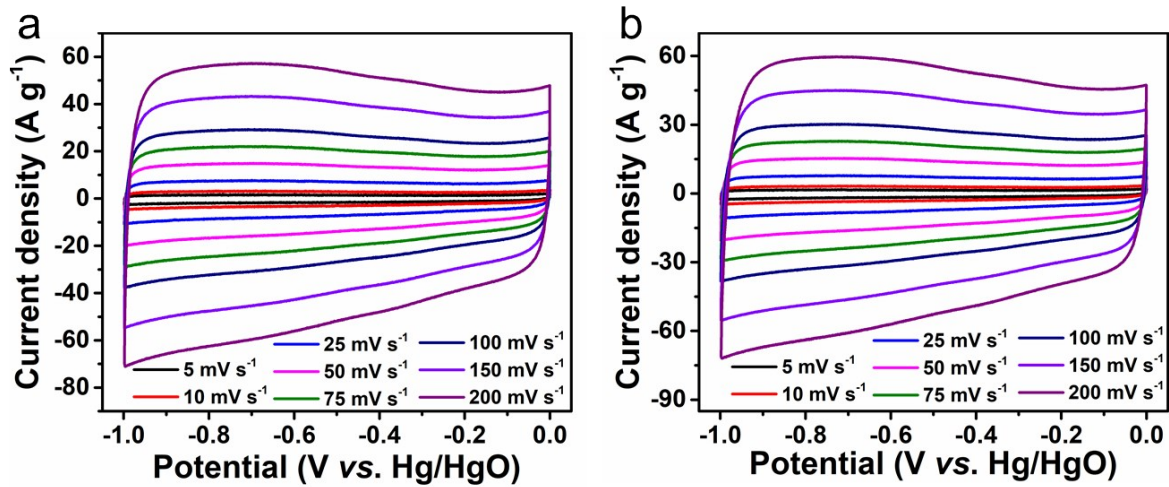

**Figure S5** CV curves of a) LS400/A800, and b) LS600/A800 electrodes in 6 M KOH aqueous solutions at different scan rates as indicated.

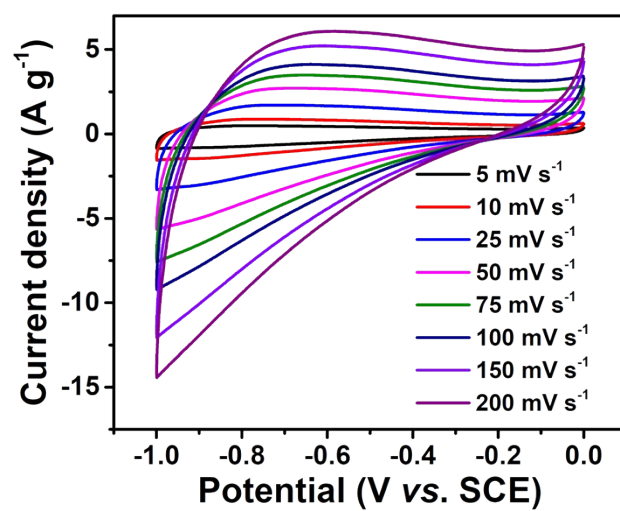

**Figure S6** CV curves of LS500 electrodes in 6 M L<sup>-1</sup> KOH solutions at different scan rates.



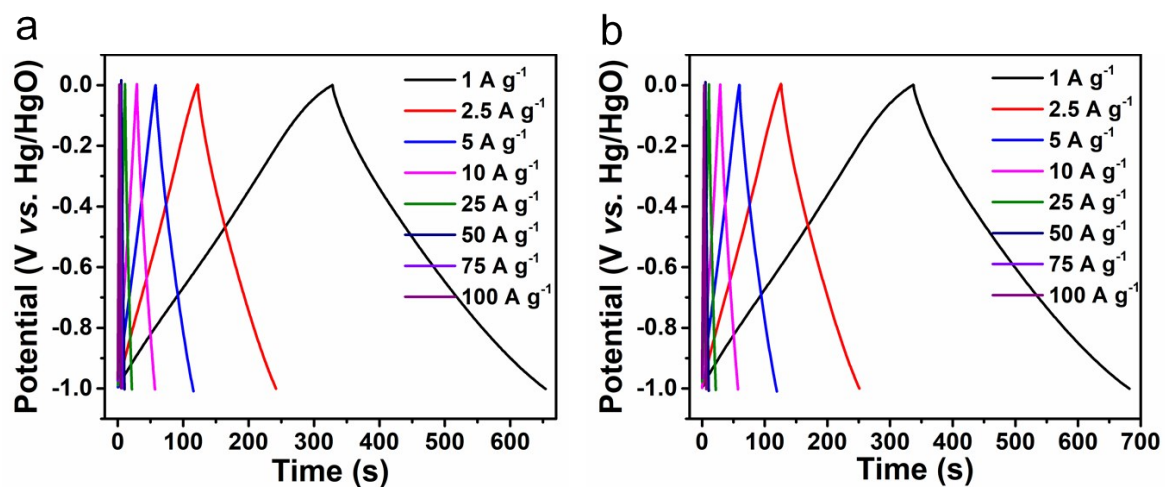

**Figure S7** Voltage profiles obtained upon galvanostatic cycling at different constant currents (indicated) of a) LS400/A800, and b) LS600/A800 electrodes. Aqueous 6 M KOH solutions.

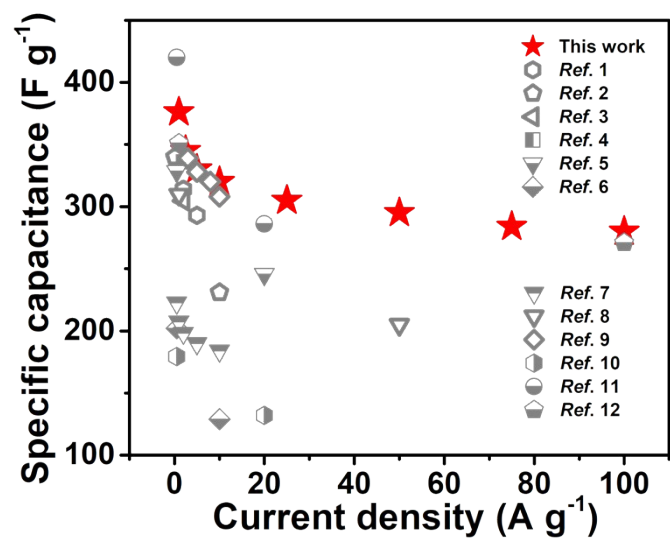

**Figure S8** Specific capacitances of LS500/A800 electrodes in supercapacitors prototype cells at different constant current densities (indicated), aqueous 6 M KOH solutions. The chart includes specific capacitance values of various supercapacitors' electrodes reported in the literature <sup>8-19</sup> for comparison.

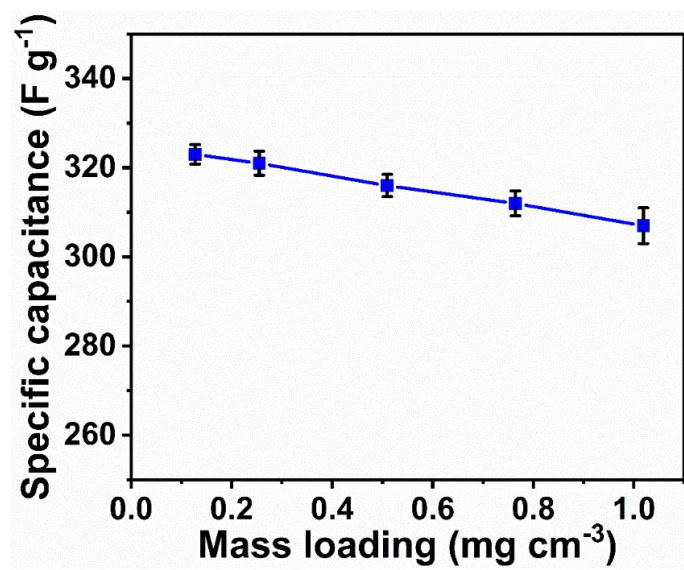

**Figure S9** Specific capacitance of LS500/A800 electrode as a function of mass loading.

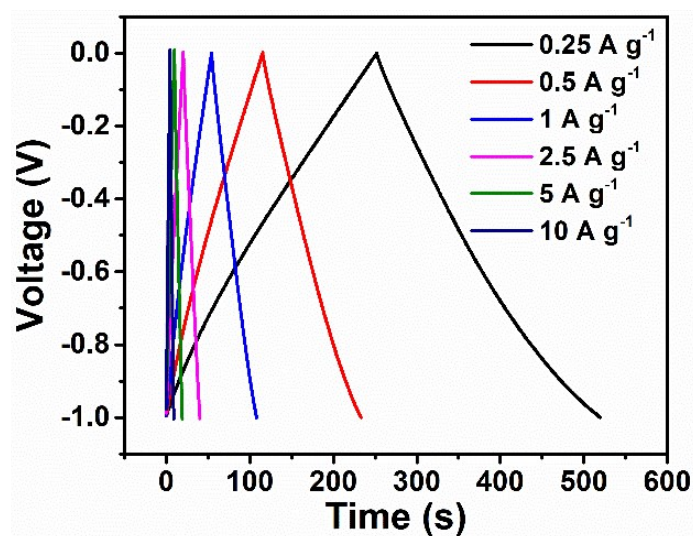

Figure S10 GCD curves of LS500/A800 based symmetrical supercapacitor.

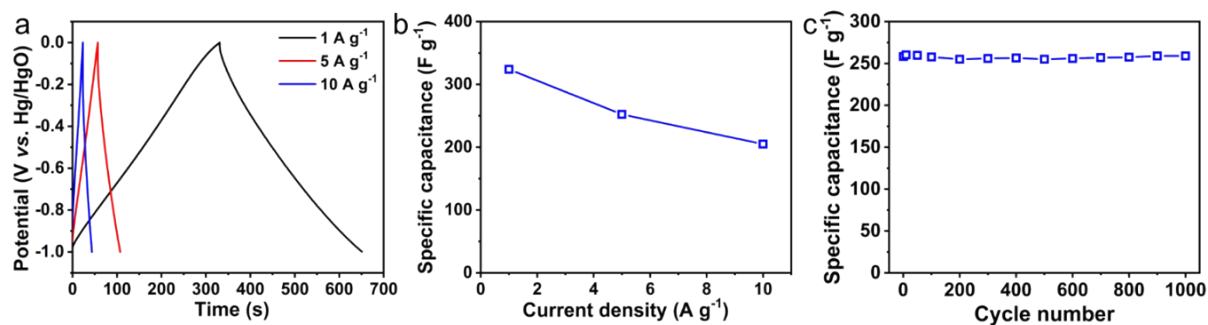

**Figure S11** a) Voltage profiles obtained upon galvanostatic cycling at different constant currents of LS500/A800 electrodes with high loading; b) Specific capacitance of these electrodes as a function of current density; c) The cycling stability of LS500/A800 electrodes with high loading (at current density of 5 A g<sup>-1</sup>). The electrolyte solution used was aqueous 6 mol L<sup>-1</sup> KOH. The maximal fluctuations in the specific capacitance data measured in parallel experiments, presented in charts b, are estimated as +/- 3% around the average values presented by the graphs.

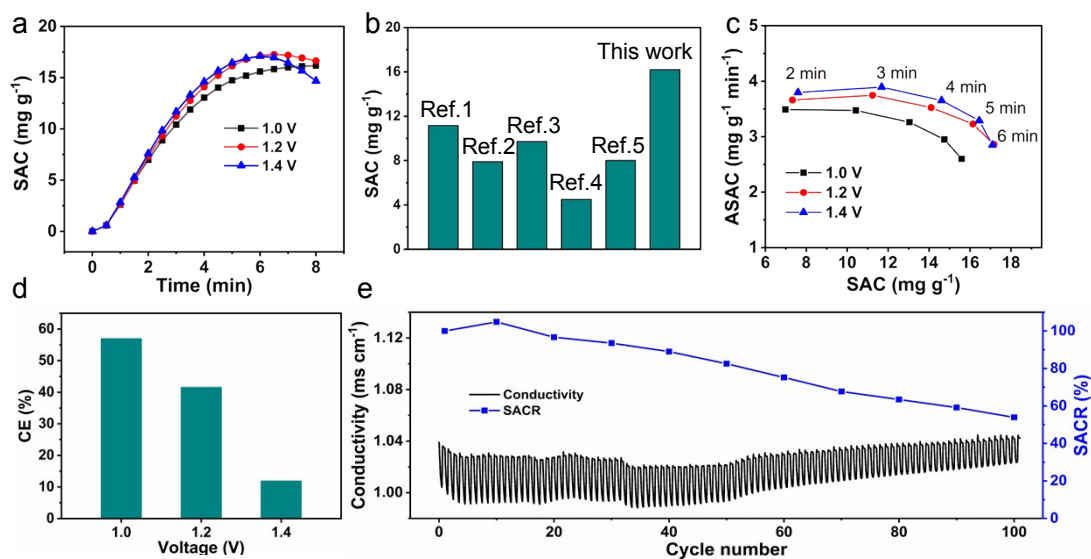

**Figure S12** a) Salt adsorption capacity of LS500/A800 based CDI in  $500 \text{ mg L}^{-1}$  NaCl solution; b) The comparison of reported SAC values with that of LS500/A800<sup>20-24</sup>. The specific references' numbers appear above the histograms in charts S12b; c) Ragone Kim-Yoon plots of the LS500/A800 electrodes in CDI cells under different working voltages; d) CE of LS500/A800 based CDI; e) Cyclic stability of LS500/A800 based CDI under 1.0 V.

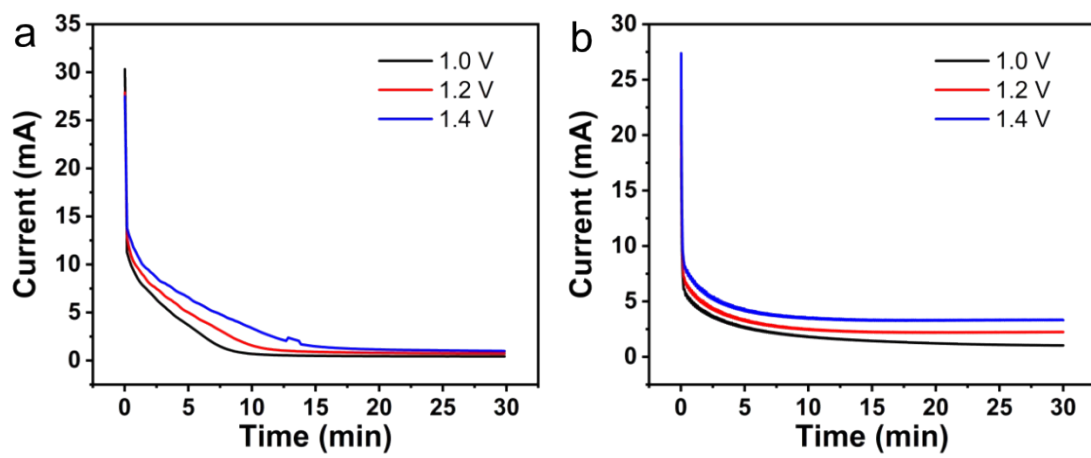

**Figure S13** Current of MCDI cells with electrodes comprising a) LS500/A800 carbon and b) AC carbon at different working voltages.

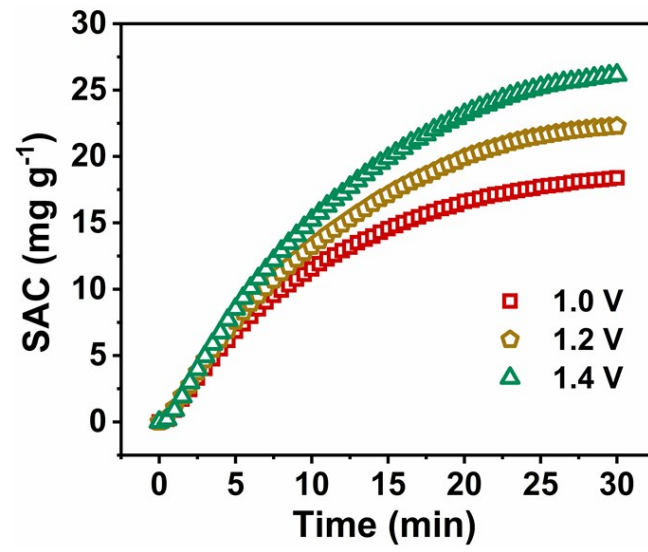

**Figure S14** SAC of AC based MCDI at different working voltages.



## Reference

1. M. Wang, X. Xu, Y. Liu, Y. Li, T. Lu and L. Pan, *Carbon*, 2016, **108**, 433-439.
2. H. Wang, T. Yan, P. Liu, G. Chen, L. Shi, J. Zhang, Q. Zhong and D. Zhang, *J. Mater. Chem. A*, 2016, **4**, 4908-4919.
3. J. Han, S. Liyi, Y. Tingting, Z. Jianping and Z. Dengsong, *Environ. Sci.: Nano*, 2018, **5**, 2337-2345.
4. S. Zhao, T. Yan, H. Wang, G. Chen, L. Huang, J. Zhang, L. Shi and D. Zhang, *Appl. Surf. Sci.*, 2016, **369**, 460-469.
5. Y. Chang, G. Zhang, B. Han, H. Li, C. Hu, Y. Pang, Z. Chang and X. Sun, *ACS Appl. Mater. Interfaces*, 2017, **9**, 29753-29759.
6. J. Xie, Y. Xue, M. He, W. Luo, H. Wang, R. Wang and Y.-M. Yan, *Carbon*, 2017, **123**, 574-582.
7. Y. Li, J. Qi, J. Li, J. Shen, Y. Liu, X. Sun, J. Shen, W. Han and L. Wang, *ACS Sustain. Chem. Eng.*, 2017, **5**, 6635-6644.
8. H. Zhang, Z. Zhang, J.-D. Luo, X.-T. Qi, J. Yu, J.-X. Cai, J.-c. Wei and Z.-Y. Yang, *ChemSusChem*, 2019, **12**, 2462-2470.
9. W. Zhang, J. Xu, D. Hou, J. Yin, D. Liu, Y. He and H. Lin, *J. Colloid Interface Sci.*, 2018, **530**, 338-344.
10. X.-L. Su, J.-R. Chen, G.-P. Zheng, J.-H. Yang, X.-X. Guan, P. Liu and X.-C. Zheng, *Appl. Surf. Sci.*, 2018, **436**, 327-336.
11. L. Peng, Y. Liang, H. Dong, H. Hu, X. Zhao, Y. Cai, Y. Xiao, Y. Liu and M. Zheng, *J. Power Sources*, 2018, **377**, 151-160.
12. H. Tan, X. Wang, D. Jia, P. Hao, Y. Sang and H. Liu, *J. Mater. Chem. A*, 2017, **5**, 2580-2591.
13. Y. Liu, B. Huang, X. Lin and Z. Xie, *J. Mater. Chem. A*, 2017, **5**, 13009-13018.
14. J. Li, W. Liu, D. Xiao and X. Wang, *Appl. Surf. Sci.*, 2017, **416**, 918-924.
15. K. Yang, Q. Gao, Y. Tan, W. Tian, W. Qian, L. Zhu and C. Yang, *Chem. Eur. J.*, 2016, **22**, 3239-3244.
16. G. Xu, J. Han, B. Ding, P. Nie, J. Pan, H. Dou, H. Li and X. Zhang, *Green Chem.*, 2015, **17**, 1668-1674.
17. K. Wang, N. Zhao, S. Lei, R. Yan, X. Tian, J. Wang, Y. Song, D. Xu, Q. Guo and L. Liu, *Electrochim. Acta*, 2015, **166**, 1-11.
18. D. Wang, Z. Geng, B. Li and C. Zhang, *Electrochim. Acta*, 2015, **173**, 377-384.
19. C. Long, X. Chen, L. Jiang, L. Zhi and Z. Fan, *Nano Energy*, 2015, **12**, 141-151.
20. D. Xu, Y. Tong, T. Yan, L. Shi and D. Zhang, *ACS Sustain. Chem. Eng.*, 2017, **5**, 5810-5819.
21. S. Porada, F. Schipper, M. Aslan, M. Antonietti, V. Presser and T. P. Fellingner, *Chemsuschem*, 2015, **8**, 1867-1874.
22. C.-L. Yeh, H.-C. Hsi, K.-C. Li and C.-H. Hou, *Desalination*, 2015, **367**, 60-68.
23. P. Liu, H. Wang, T. Yan, J. Zhang, L. Shi and D. Zhang, *J. Mater. Chem. A*, 2016, **4**, 5303-5313.
24. W. H. Shi, H. B. Li, X. H. Cao, Z. Y. Leong, J. Zhang, T. P. Chen, H. Zhang and H. Y. Yang, *Sci. Rep.*, 2016, **6**, 18966.
